# Supplementary material for: Brassinosteroids are involved in Fe homeostasis in rice (Oryza sativa L.)
Source: PubMed Central journal article supplement (PMC4986876; doi:10.1093/jxb/erv079), 2015-03-14
Supplement: supp_erv079_jexbot139881_file001.pdf [file supp_erv079_jexbot139881_file001.pdf]

**Supplementary Table S1.** The primers that were used for quantitative RT-PCR in the study.

| Gene                | Forward primer                     | Reverse primer                      |
|---------------------|------------------------------------|-------------------------------------|
| <i>OsFRDL1</i>      | 5'-TCACCAATGCTAAGGCCTGC-3'         | 5'-AACCACGGAAAACACCCTG-3'           |
| <i>OsYSL2</i>       | 5'-TACAAAAGGGTAAGTGGTATCC-3'       | 5'-AAATG TATCCTCATCTGTTCGC-3'       |
| <i>OsYSL15</i>      | 5'-AACATAAGGGGGACTGGTAC-3'         | 5'-TGATTACCGCAATGATGCTTAG-3'        |
| <i>OsIRT1</i>       | 5'-CGTC TTCTTCTTCTCCACCACGAC-3'    | 5'-GCAGCTGATGATCGAGTCTG ACC-3'      |
| <i>OsNAS1</i>       | 5'-GTCTAACAGCCGGACGATCGAAAGG-3'    | 5'-TTTCTCACTGTCATACACAGATGGC-3'     |
| <i>OsNAS2</i>       | 5'-TGAGTGCGTGCA TAGTAATCCTGGC-3'   | 5'-CAGACGGTCACAAACACCTCTTGC-3'      |
| <i>OsIRO2</i>       | 5'-CTCCCATCGTTTCGGCTACCT-3'        | 5'-GCTGGGCACTCCTCGTTGATC-3'         |
| <i>OsBRI1</i>       | 5' CAGCTACTTGGCTATCTTGAAGCTCAGC-3' | 5'-CCATTCTTGTTGA AGGTGTACTCCGTGC-3' |
| <i>OsD2/CYP90D2</i> | 5'-TTCAACCCATGGAGGTGGAA-3'         | 5'-GCACGGTGGGGAAGTTGACGA-3'         |
| <i>OsDWARF</i>      | 5'-GGAGAAGAACATGGAATCAC-3'         | 5'-GTAATCTTGAACGCGGATATG-3'         |
| <i>OsTUBA1</i>      | 5'-CATGATCTGCCAGTGTGGAGTT-3'       | 5'-GCCCATTAAGCCCCAAACAT-3'          |
| <i>OsActin</i>      | 5'-TGCTATGTACGTCGC CATCCAG-3'      | 5'-AATGAGTAACCACGCTCCGTCA-3'        |

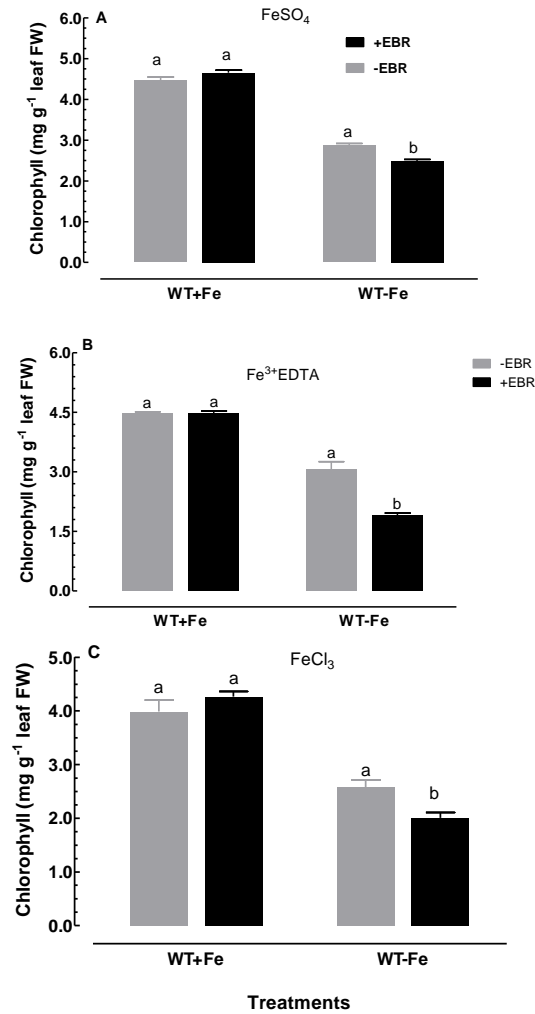

**Supplementary Fig. S1.** Effect of EBR on CHL in wild-type rice seedlings in the presence and absence of different forms of Fe (Fe<sup>3+</sup>, Fe<sup>2+</sup>). Photographs of 10-d-old WT rice seedlings exposed to FeSO<sub>4</sub> (A), Fe<sup>3+</sup>EDTA (B), and FeCl<sub>3</sub> (C) sufficient or deficient medium with and without 100 nM EBR for 2 weeks. The chlorophyll content in WT rice leaves was determined (B). Data are means ± s.e. of six replicates. Means with different letters are significantly different ( $P \leq 0.05$ ) with regard to the same Fe treatments.

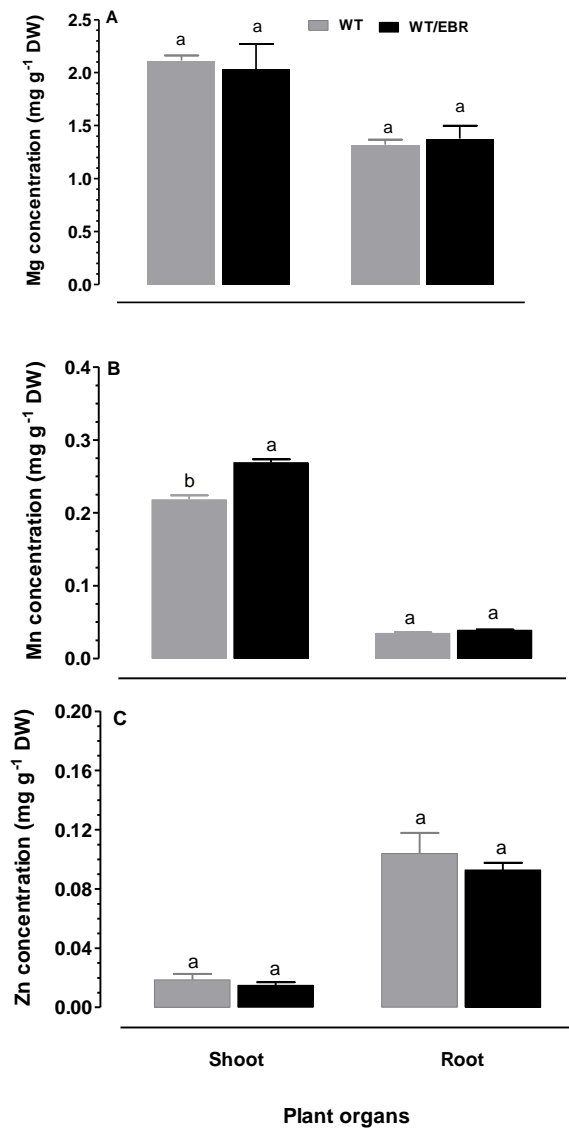

**Supplementary Fig. S2.** Effect of EBR on Mg, Mn and Zn concentrations in shoots and roots of wild-type rice seedlings (A, B, C). Ten-d-old WT seedlings were exposed to Fe-sufficient medium with and without 100 nM EBR for 2 weeks. After treatments, Mg, Mn and Zn concentrations were measured. Data are means  $\pm$  s.e. ( $n = 4$ ). Means with different letters are significantly different ( $P \leq 0.05$ ) within the same Fe treatment.

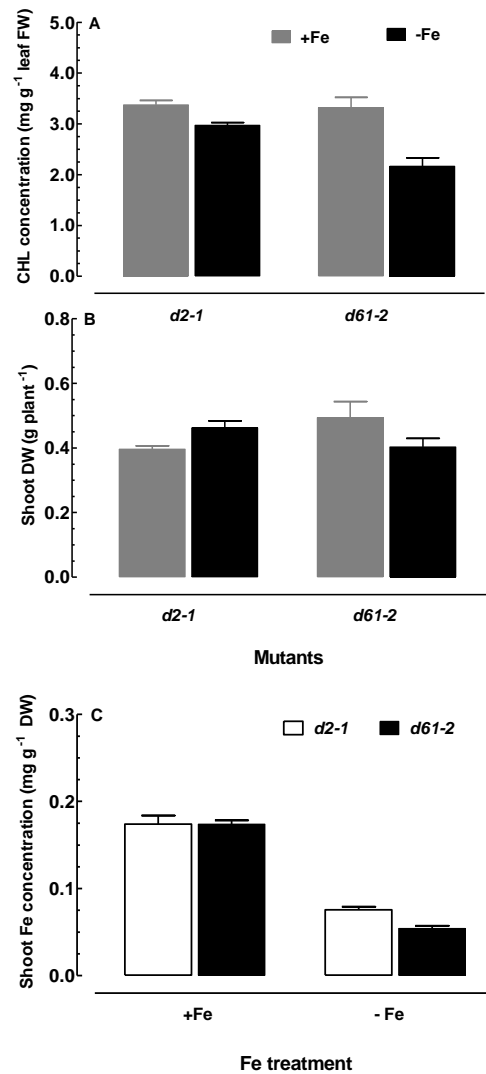

**Supplemenray Fig. S3.** Effect of Fe deficiency on CHL concentrations (A), shoot and root dry weight (B), Fe concentrations (C) in shoots of *d2-1* and *d61-2* mutants. Ten-d-old *d2-1* and *d61-2* (BR receptor mutant) seedlings were exposed to Fe-deficient medium for 2 weeks. After treatments, CHL, shoot DW and shoot Fe were measured. Data are means  $\pm$  s.e. (n = 4).

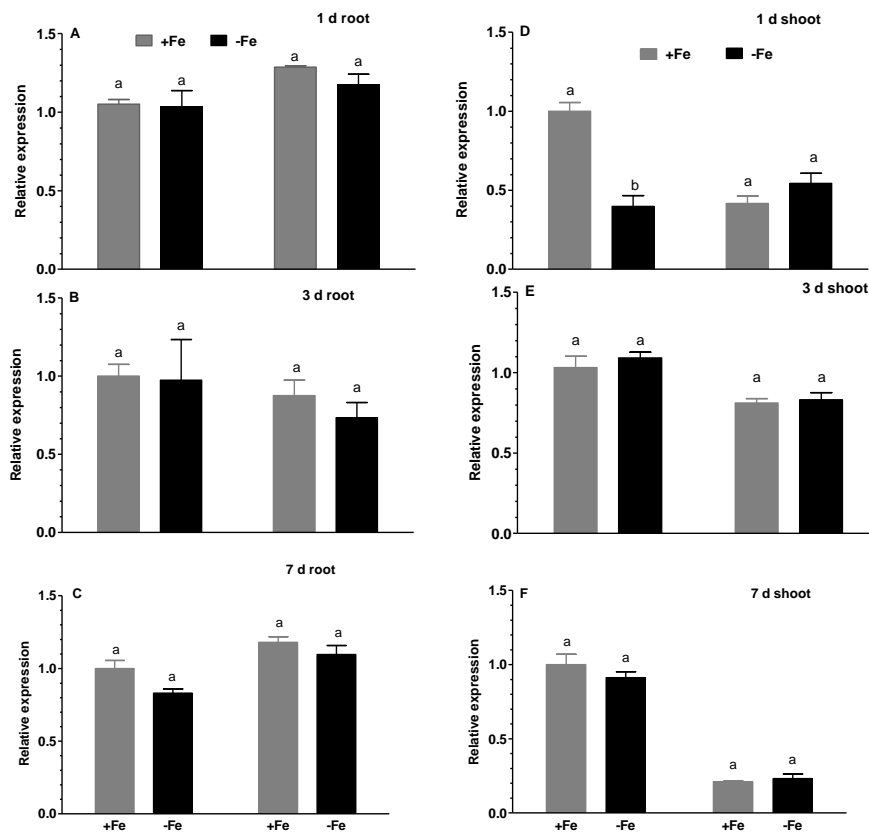

**Supplementary Fig. S4.** Time-course quantitative RT-PCR analysis of OsD2 in roots and shoots of WT and *d2-1* mutant plants under different Fe supply conditions. Data are means  $\pm$  s.e. of three biological replicates. Means with different letters are significantly different within the same gene ( $P \leq 0.05$ )
